# Supplementary material for: Bioguided Isolation of Alkaloids and Pharmacological Effects of the Total Alkaloid Fraction from Aspidosperma pyrifolium Mart. (Apocynaceae)
Source: MDPI journal article supplement (doi:10.3390/plants10112526), 2021-11-20
Supplement: s1 [file s1]

**Bioguided isolation of alkaloids and pharmacological effects of the total alkaloid fraction from *Aspidosperma pyrifolium* Mart. (APOCYNACEAE)**

**Content**

**General Experimental Procedures**

**Figure S1.** UV spectrum of **1** and **2**

**Figure S2.**  $^1\text{H}$  NMR spectrum of **1** and **2** (500 MHz, acetone- $\text{d}_6$ )

**Figure S3.**  $^1\text{H}$  NMR spectrum expansion of **1** and **2** (500 MHz, acetone- $\text{d}_6$ )

**Figure S4.**  $^1\text{H}$  NMR spectrum expansion of **1** and **2** (500 MHz, acetone- $\text{d}_6$ )

**Figure S5.**  $^1\text{H}$  NMR spectrum expansion of **1** and **2** (500 MHz, acetone- $\text{d}_6$ )

**Figure S6.**  $^{13}\text{C}$  NMR spectrum of **1** and **2** (125 MHz, acetone- $\text{d}_6$ )

**Figure S7.**  $^{13}\text{C}$  NMR spectrum expansion of **1** and **2** (125 MHz, acetone- $\text{d}_6$ )

**Figure S8.** HSQC spectrum of **1** and **2** (acetone- $\text{d}_6$ )

**Figure S9.** HSQC spectrum expansion of **1** and **2** (acetone- $\text{d}_6$ )

**Figure S10.** HMBC spectrum of **1** and **2** (acetone- $\text{d}_6$ )

**Figure S11.** HMBC spectrum expansion of **1** and **2** (acetone- $\text{d}_6$ )

**Figure S12.** HMBC spectrum expansion of **1** and **2** (acetone- $\text{d}_6$ )

**Figure S13.** NOESY spectrum expansion of **1** and **2** (acetone- $\text{d}_6$ )

**General Experimental Procedures**

The fraction was diluted in 0.2% aqueous trifluoroacetic acid (TFA):acetonitrile (ACN) solution (1:1 – v:v) to 1 mg mL<sup>-1</sup> and the volume injected into the device was 50  $\mu\text{L}$ . Reverse phase column C-18 maintained at 40° C and, as mobile phase, 0.2% TFA:ACN aqueous solution (77:23 to 65:35 v: v) was used with 10 mL flow rate. min<sup>-1</sup>, 15 minutes, gradient mode. The sample was injected on preparative HPLC (2767 Sample Manager system, Waters, with UV-Vis photodiode detector).  $^1\text{H}$  and  $^{13}\text{C}$  NMR spectra (500 and 125 MHz, acetone- $\text{d}_6$ ) (1D and 2D) were recorded on a Varian Mercury spectrometer using TMS as the internal standard.

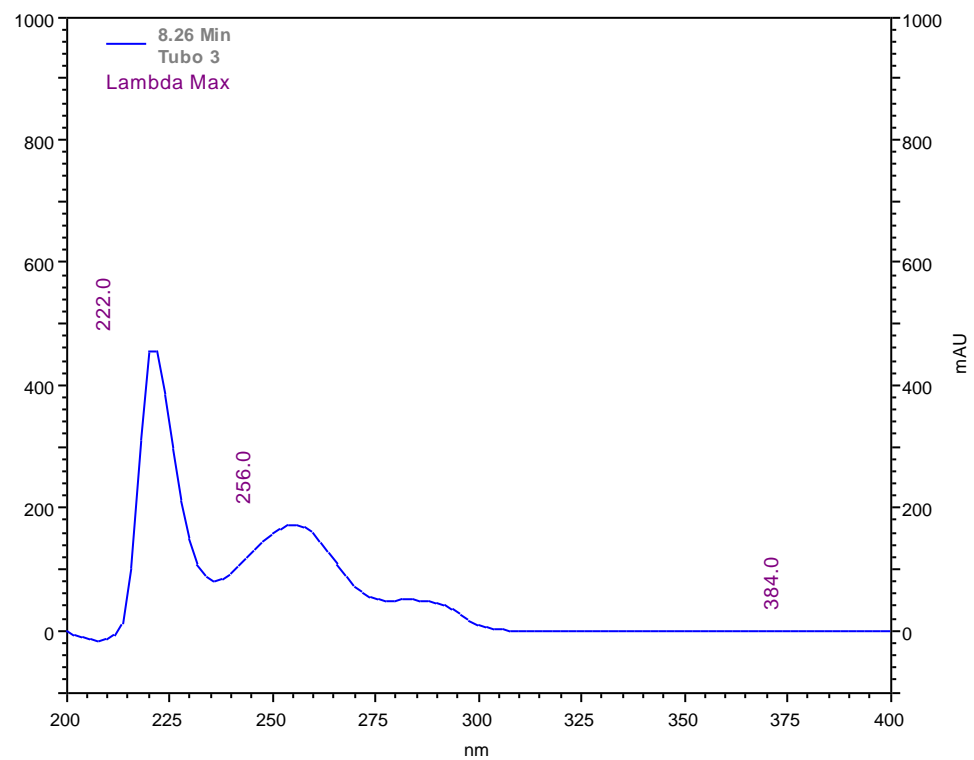

**Figure S1.** UV spectrum de **1** and **2**

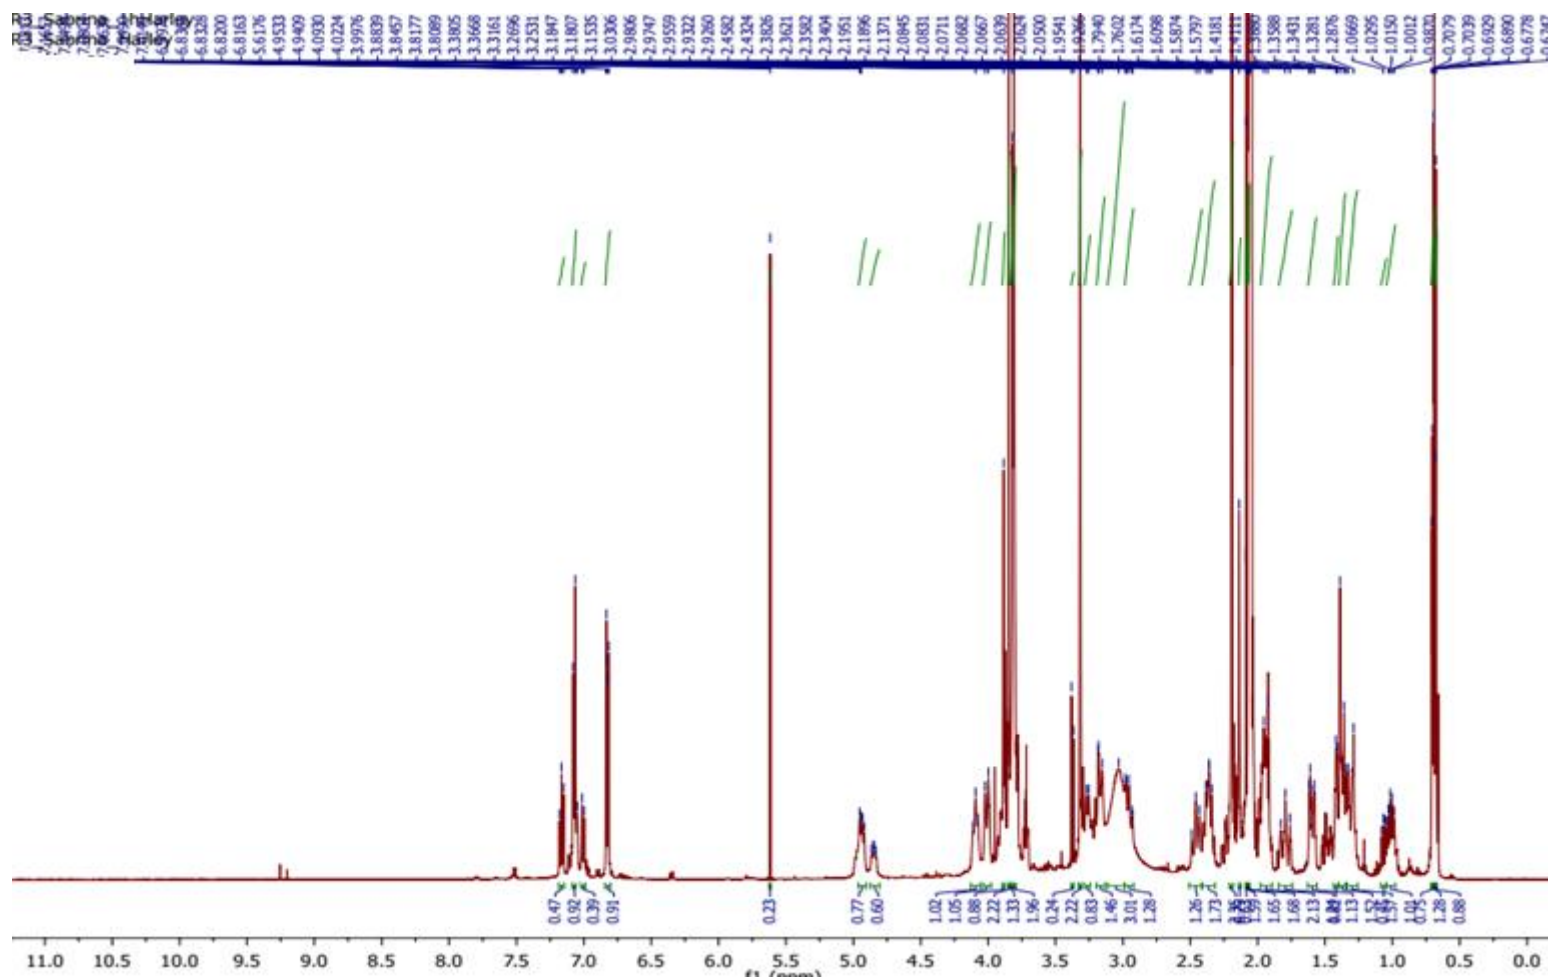

**Figure S2.**  $^1\text{H}$  NMR spectrum of **1** and **2** (500 MHz, acetone- $\text{d}_6$ )

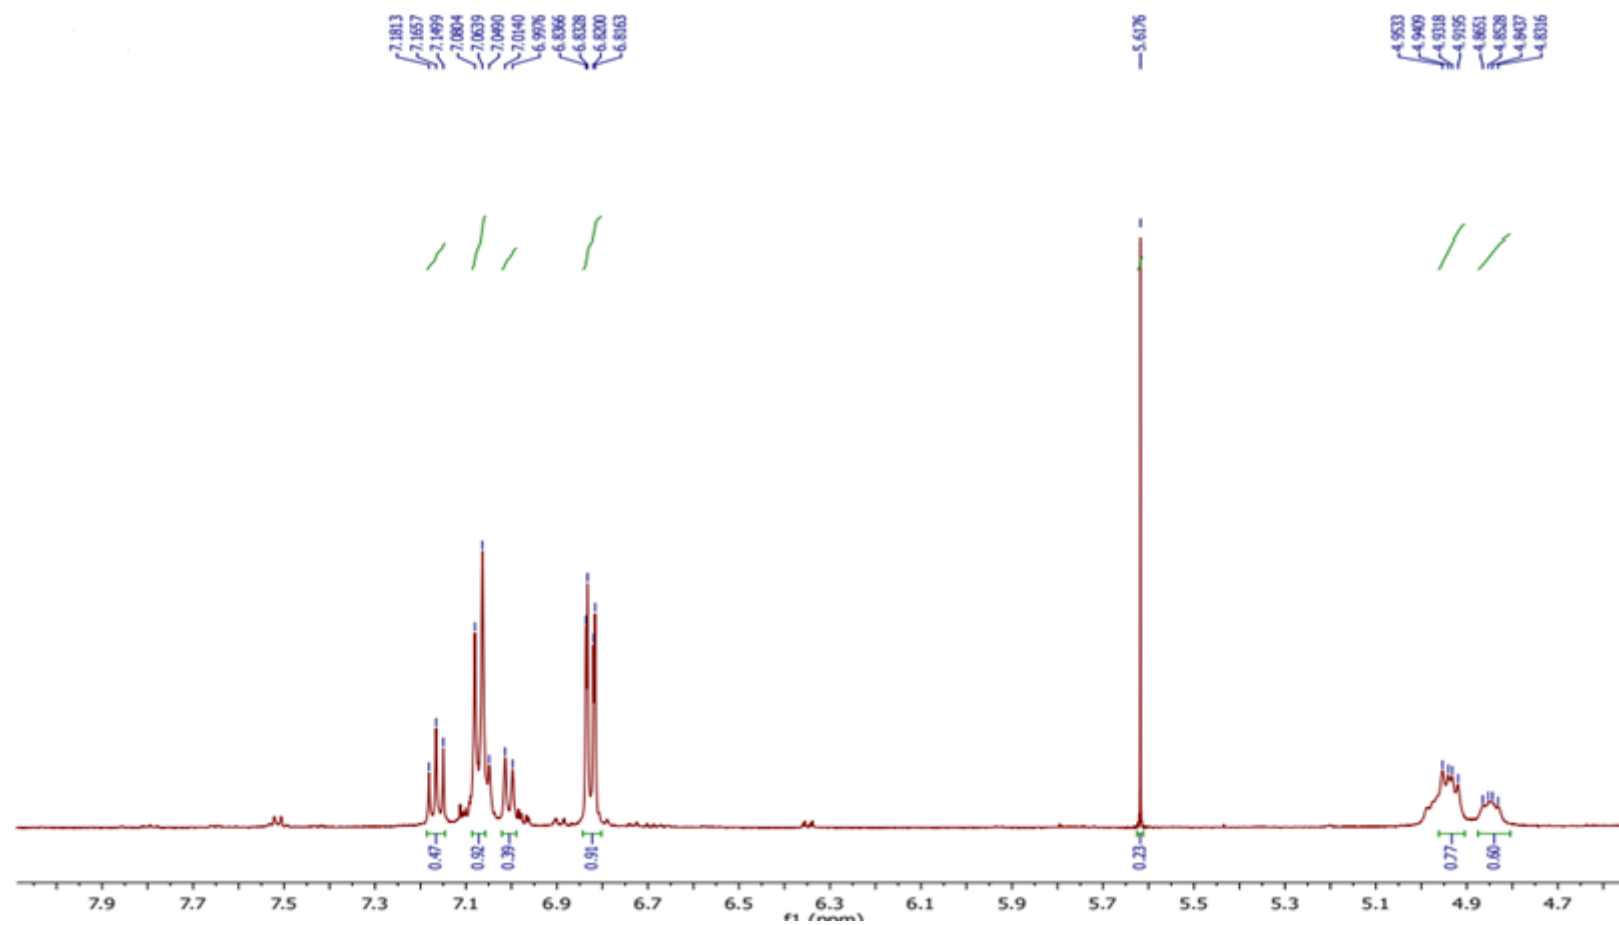

**Figure S3.**  $^1\text{H}$  NMR spectrum expansion of **1** and **2** (500 MHz,  $\text{acetone-d}_6$ )

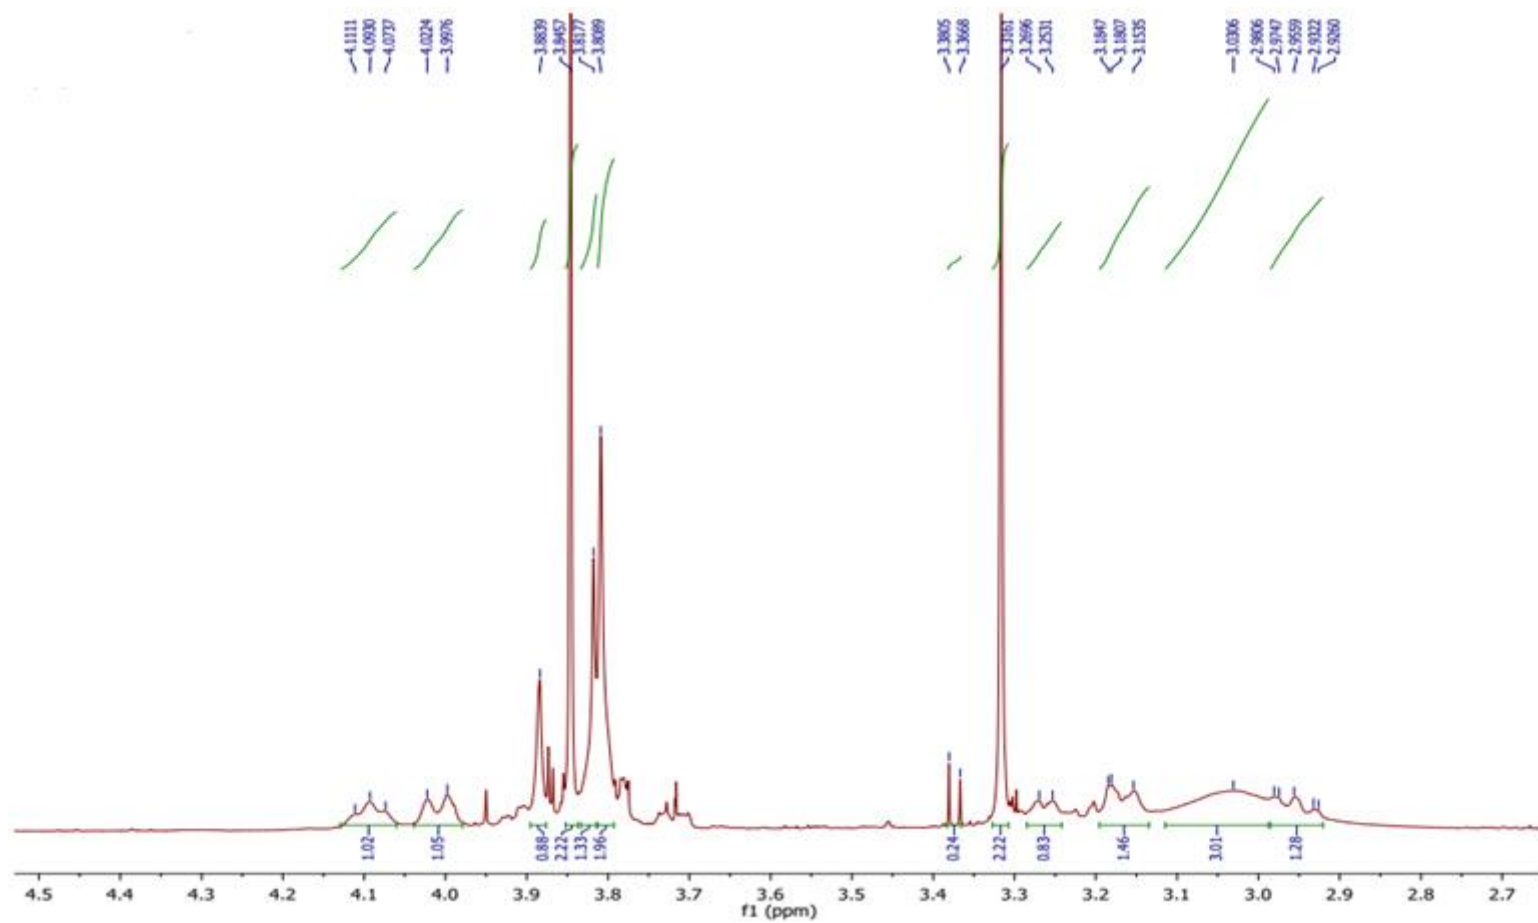

**Figure S4.**  $^1\text{H}$  NMR spectrum expansion of **1** and **2** (500 MHz, acetone- $\text{d}_6$ )

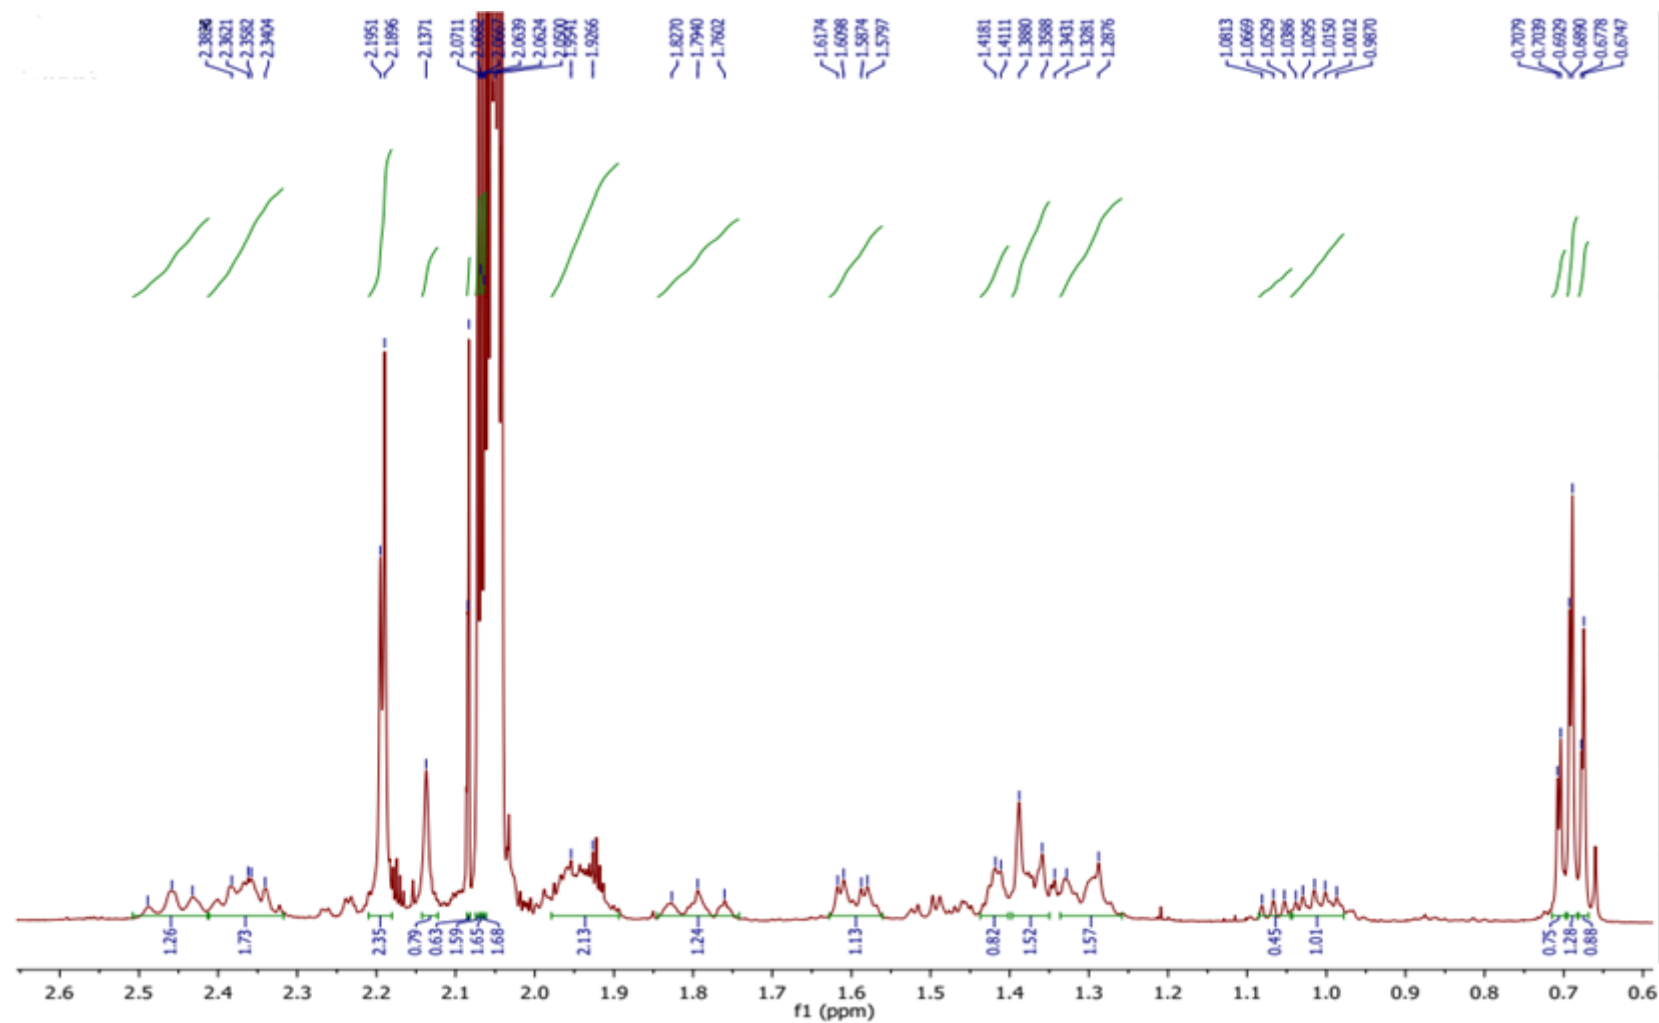

**Figure S5.**  $^1\text{H}$  NMR spectrum expansion of **1** and **2** (500 MHz,  $\text{acetone-d}_6$ )

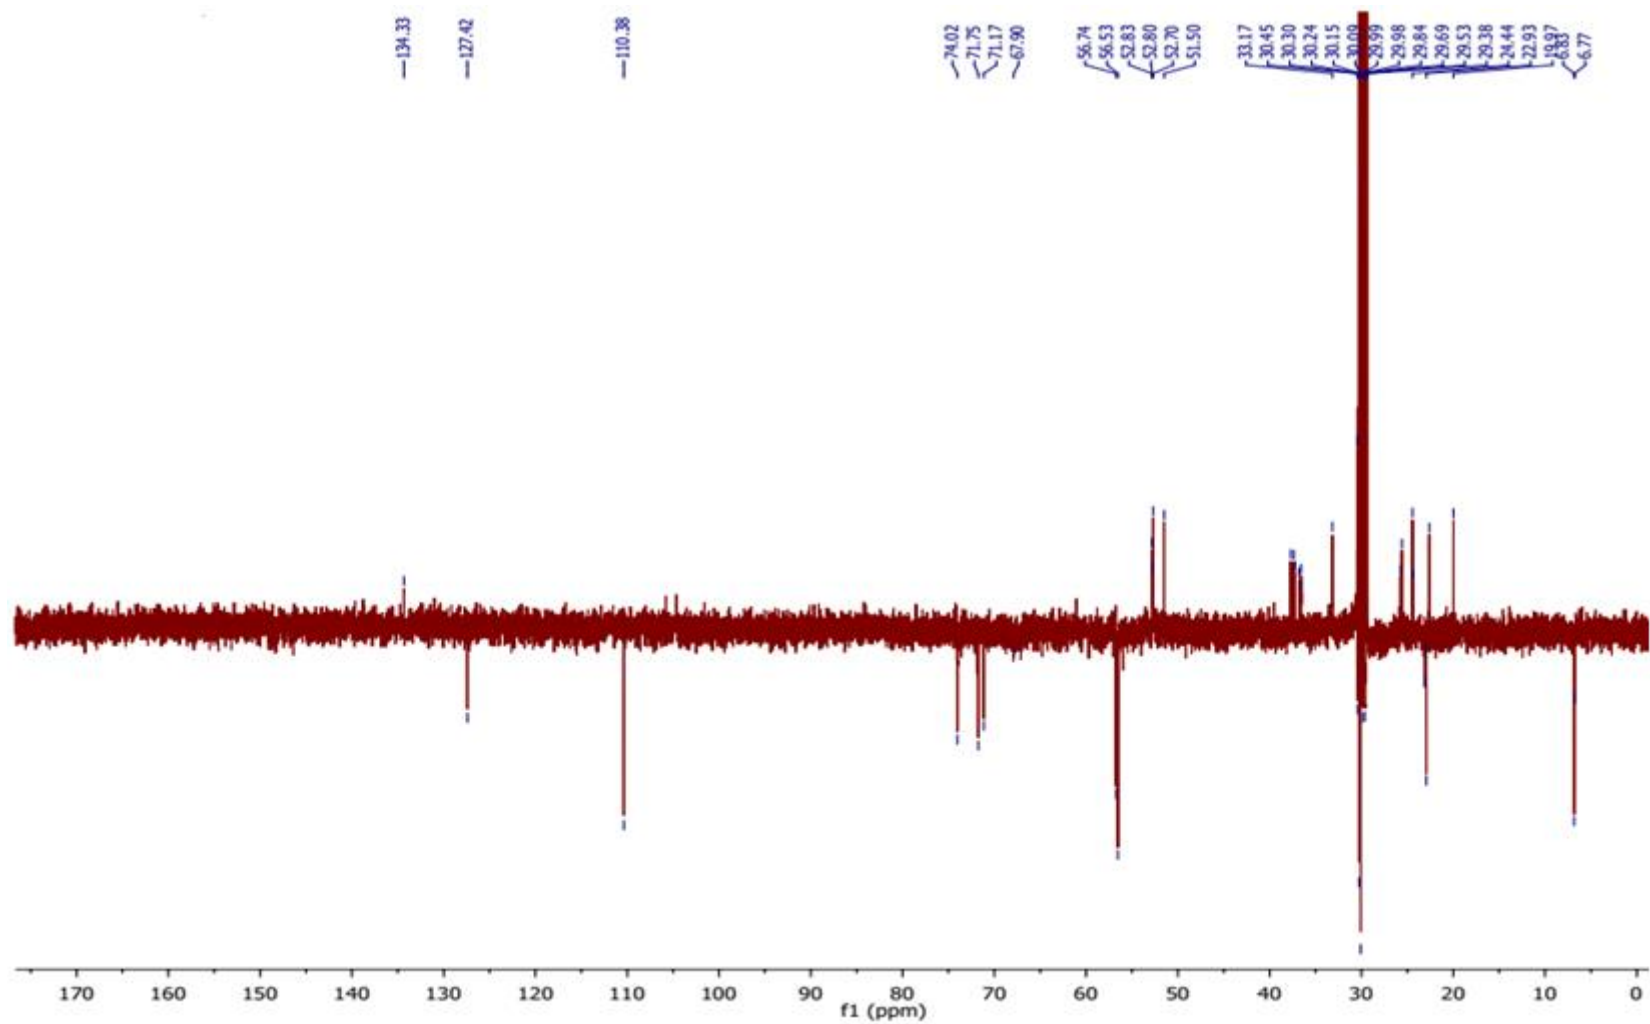

**Figure S6.**  $^{13}\text{C}$  NMR spectrum of **1** and **2** (125 MHz, acetone- $\text{d}_6$ )

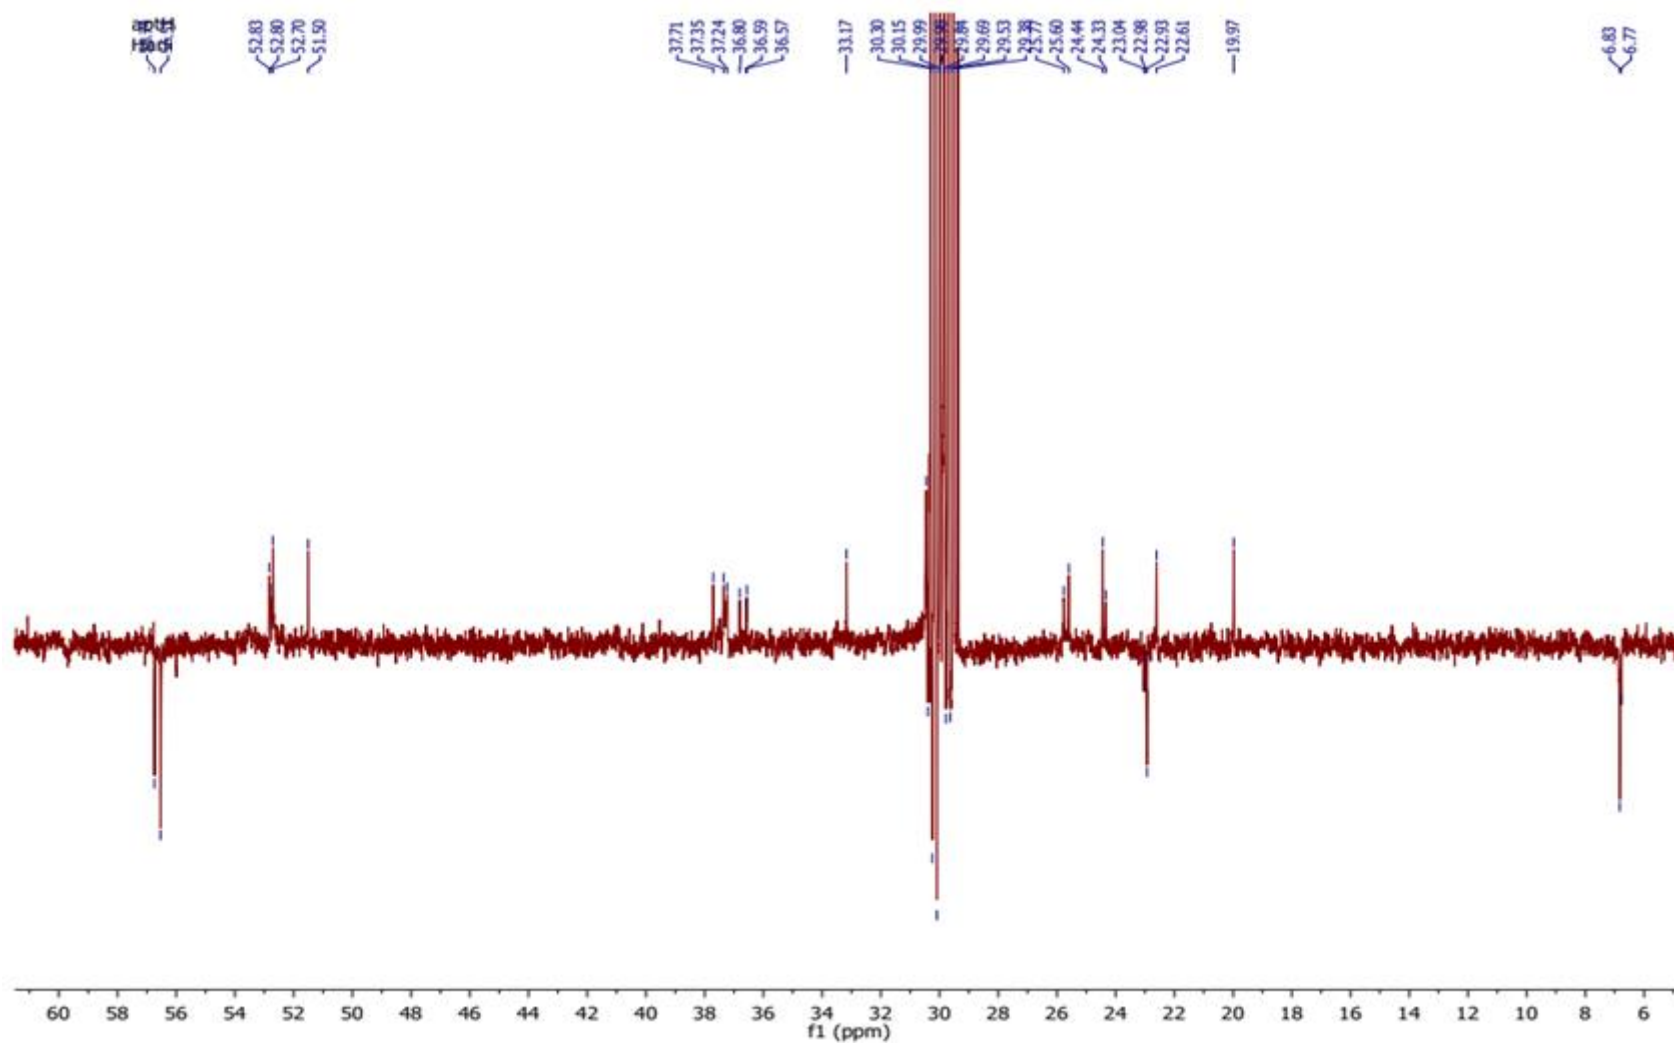

**Figure S7.**  $^{13}\text{C}$  NMR spectrum expansion of **1** and **2** (125 MHz, acetone- $\text{d}_6$ )



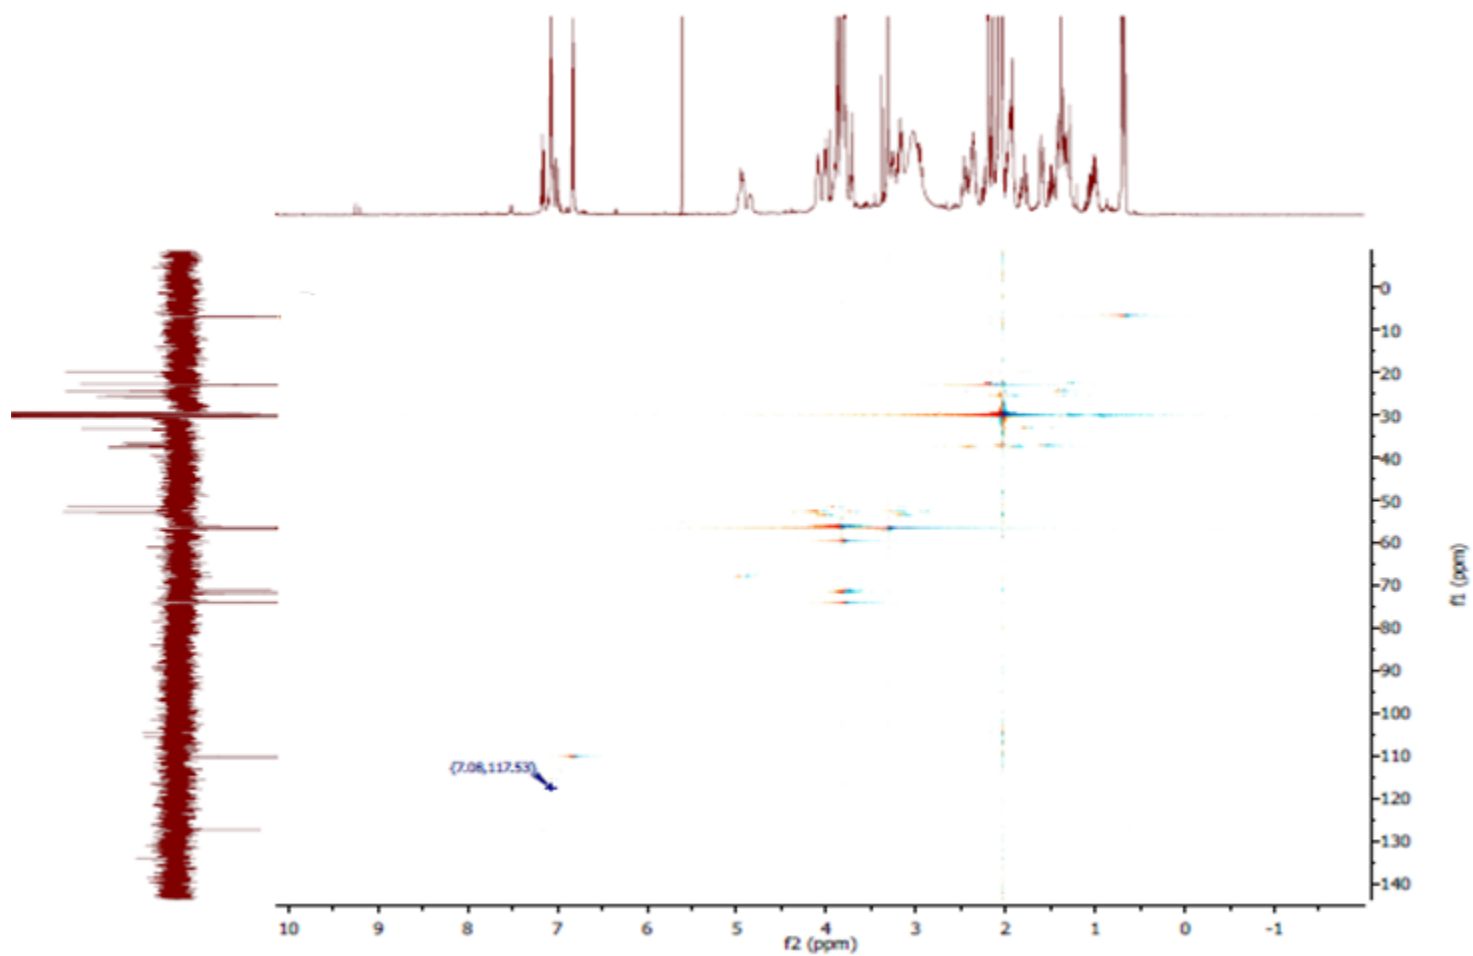

**Figure S8.** HSQC spectrum of **1** and **2** (acetone- $\text{d}_6$ )

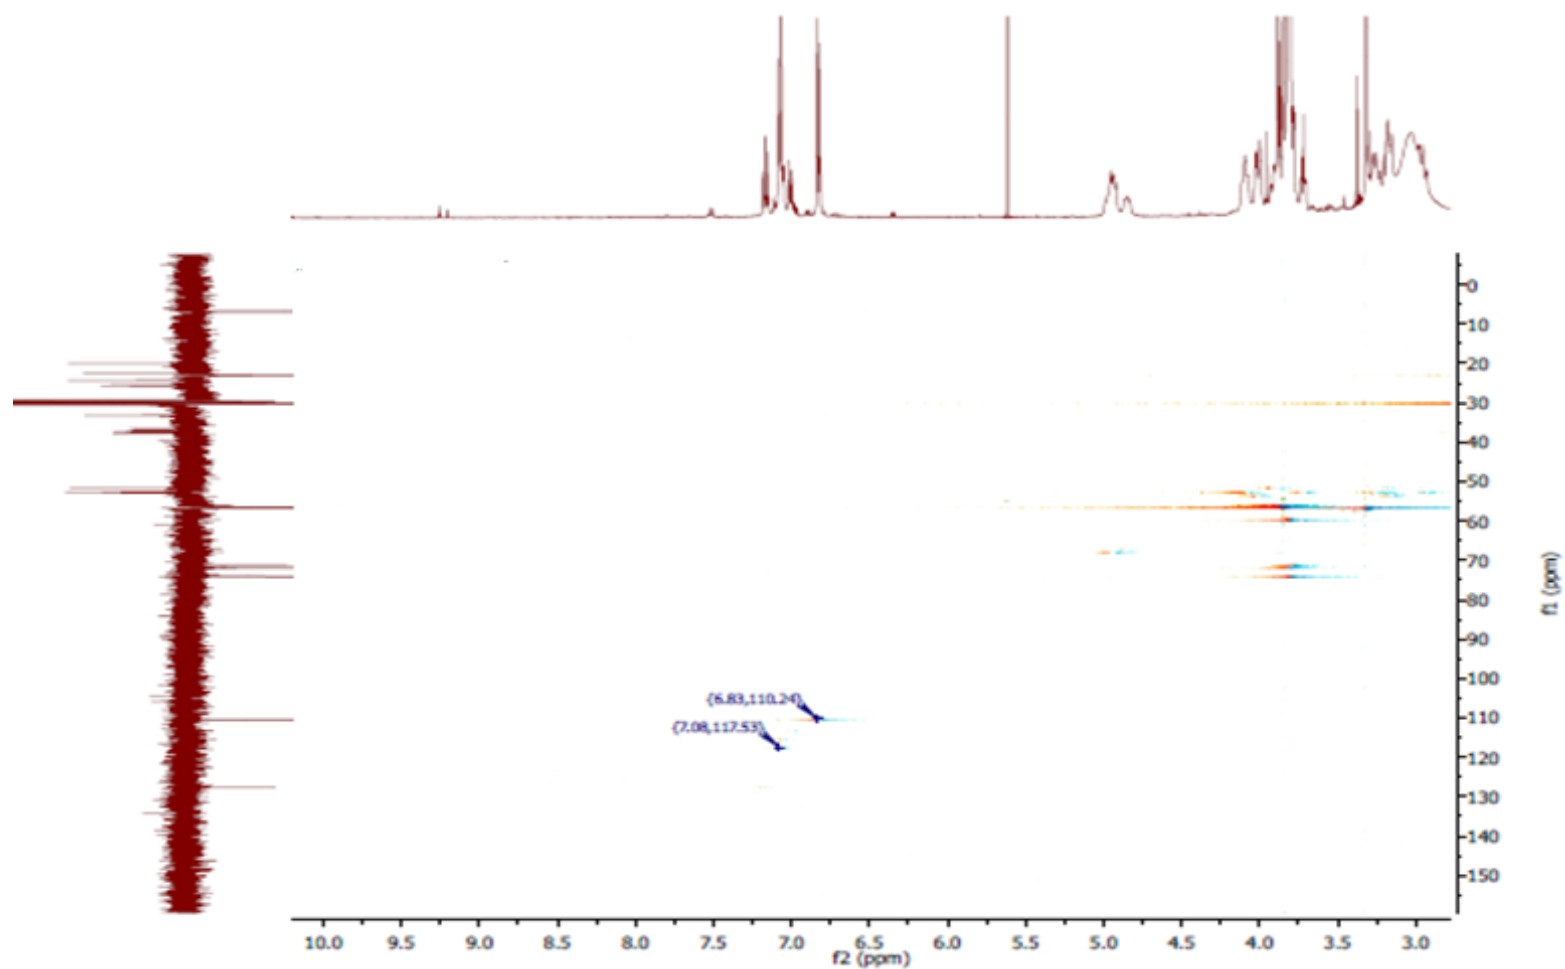

**Figure S9.** HSQC spectrum expansion of **1** and **2** (acetone- $\text{d}_6$ )

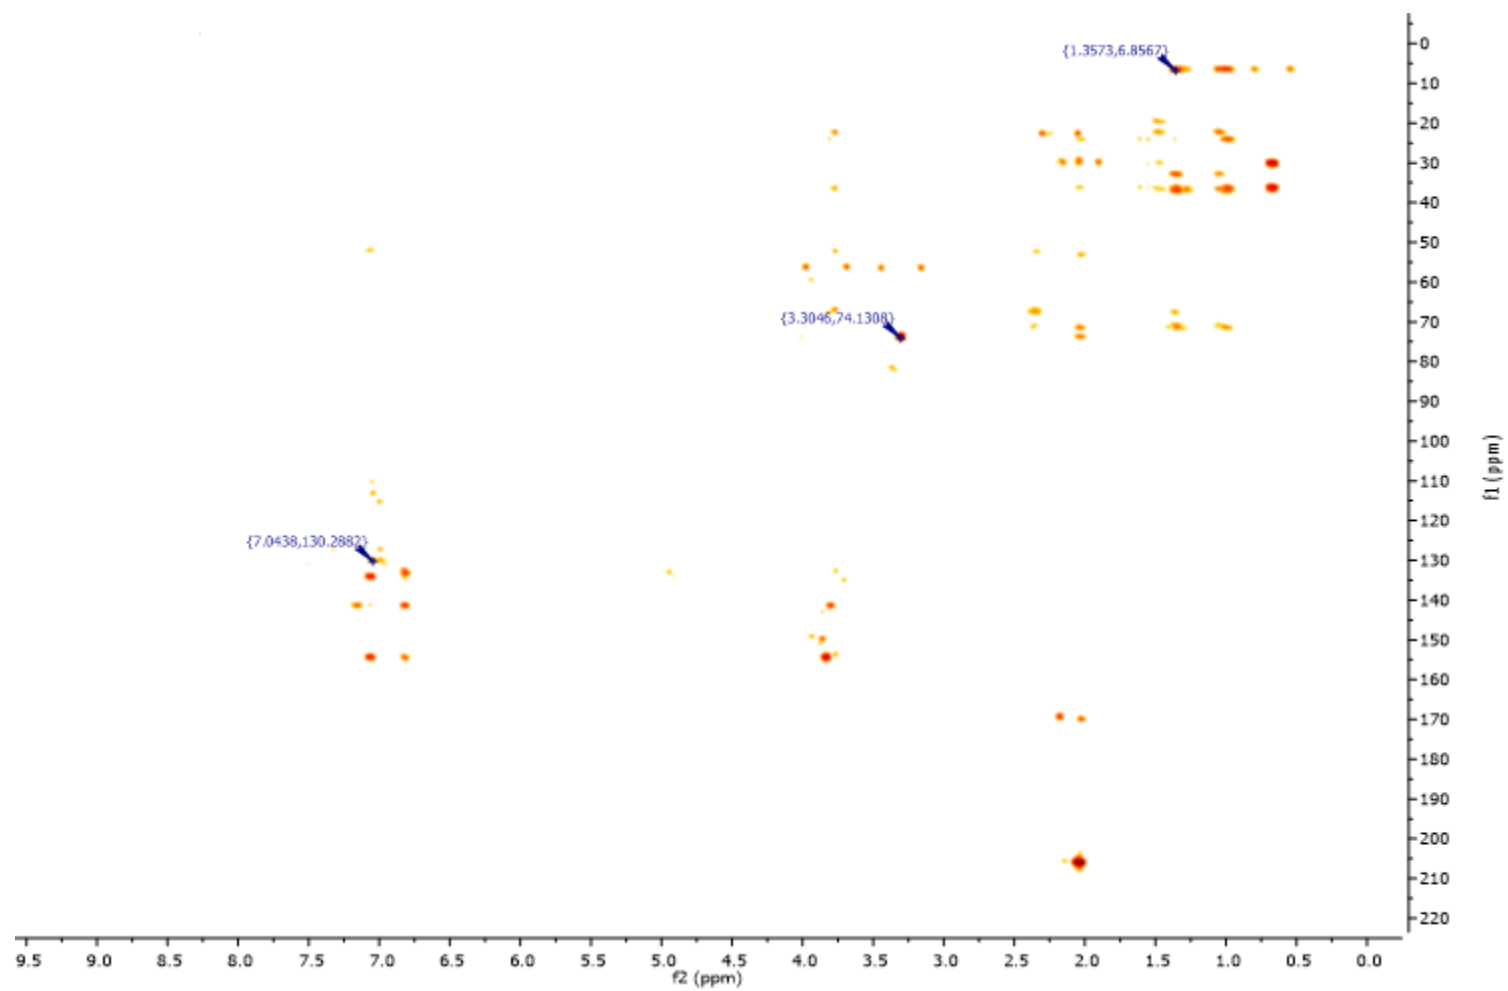

**Figure S10.** HMBC spectrum of **1** and **2** (acetone- $d_6$ )

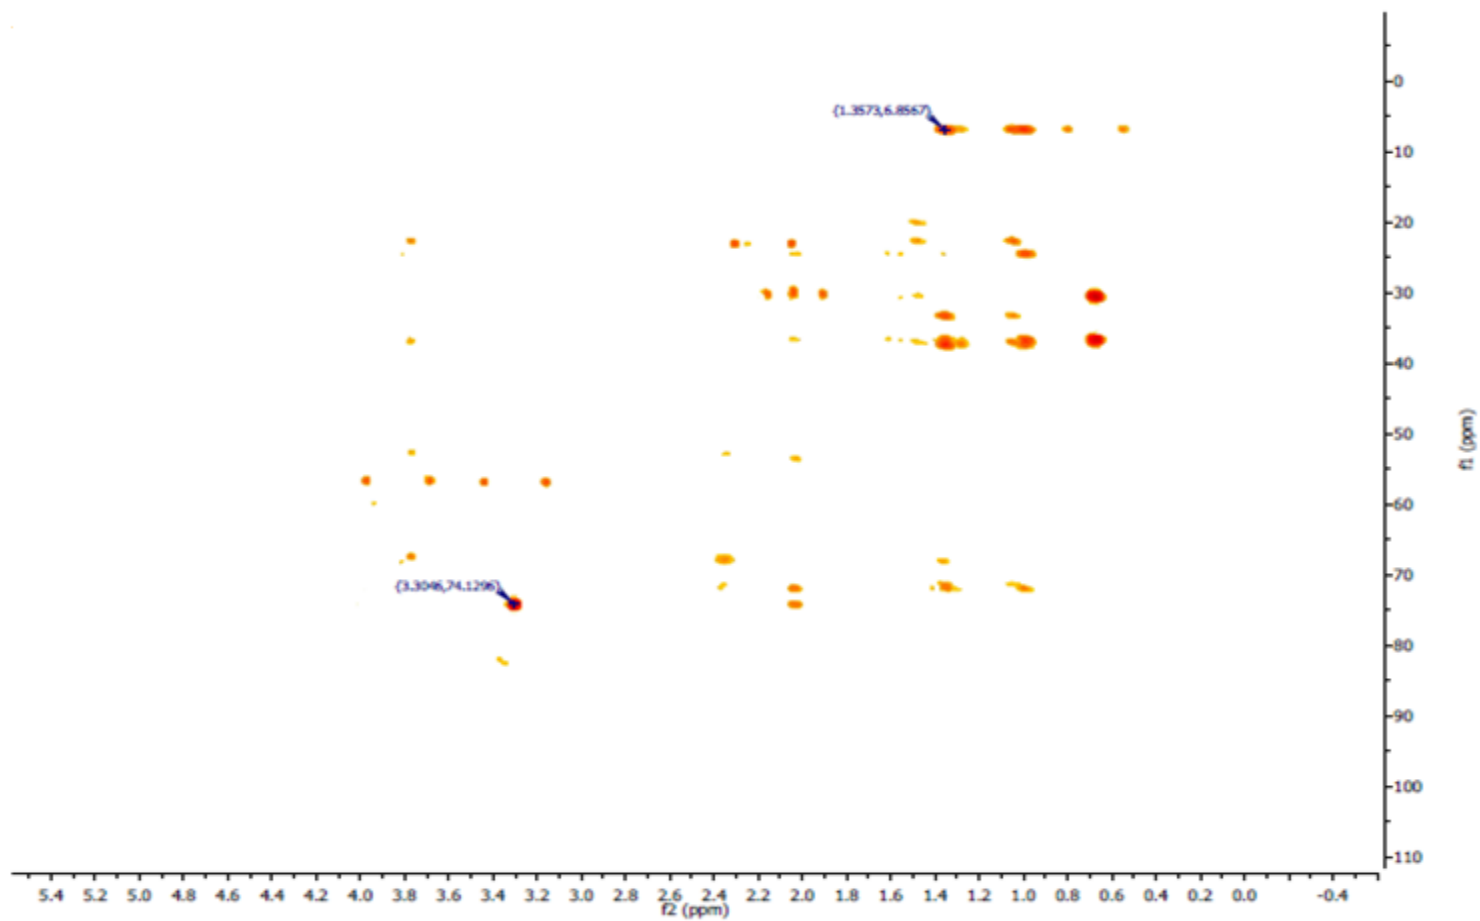

**Figure S11.** HMBC spectrum expansion of **1** and **2** (acetone- $\text{d}_6$ )

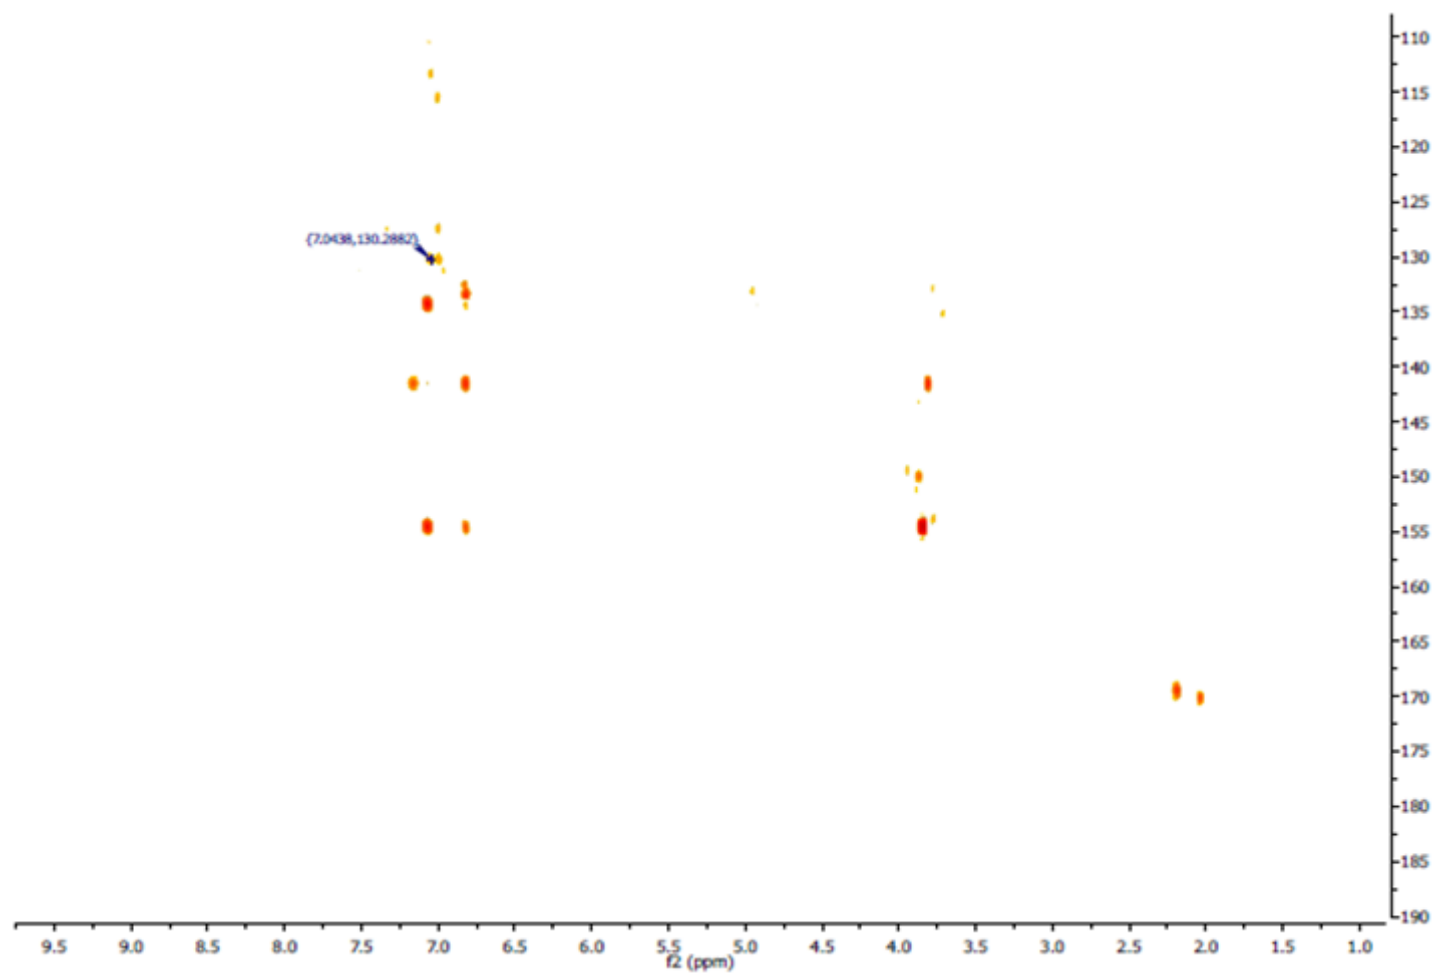

**Figure S12.** HMBC spectrum expansion of **1** and **2** (acetone- $d_6$ )

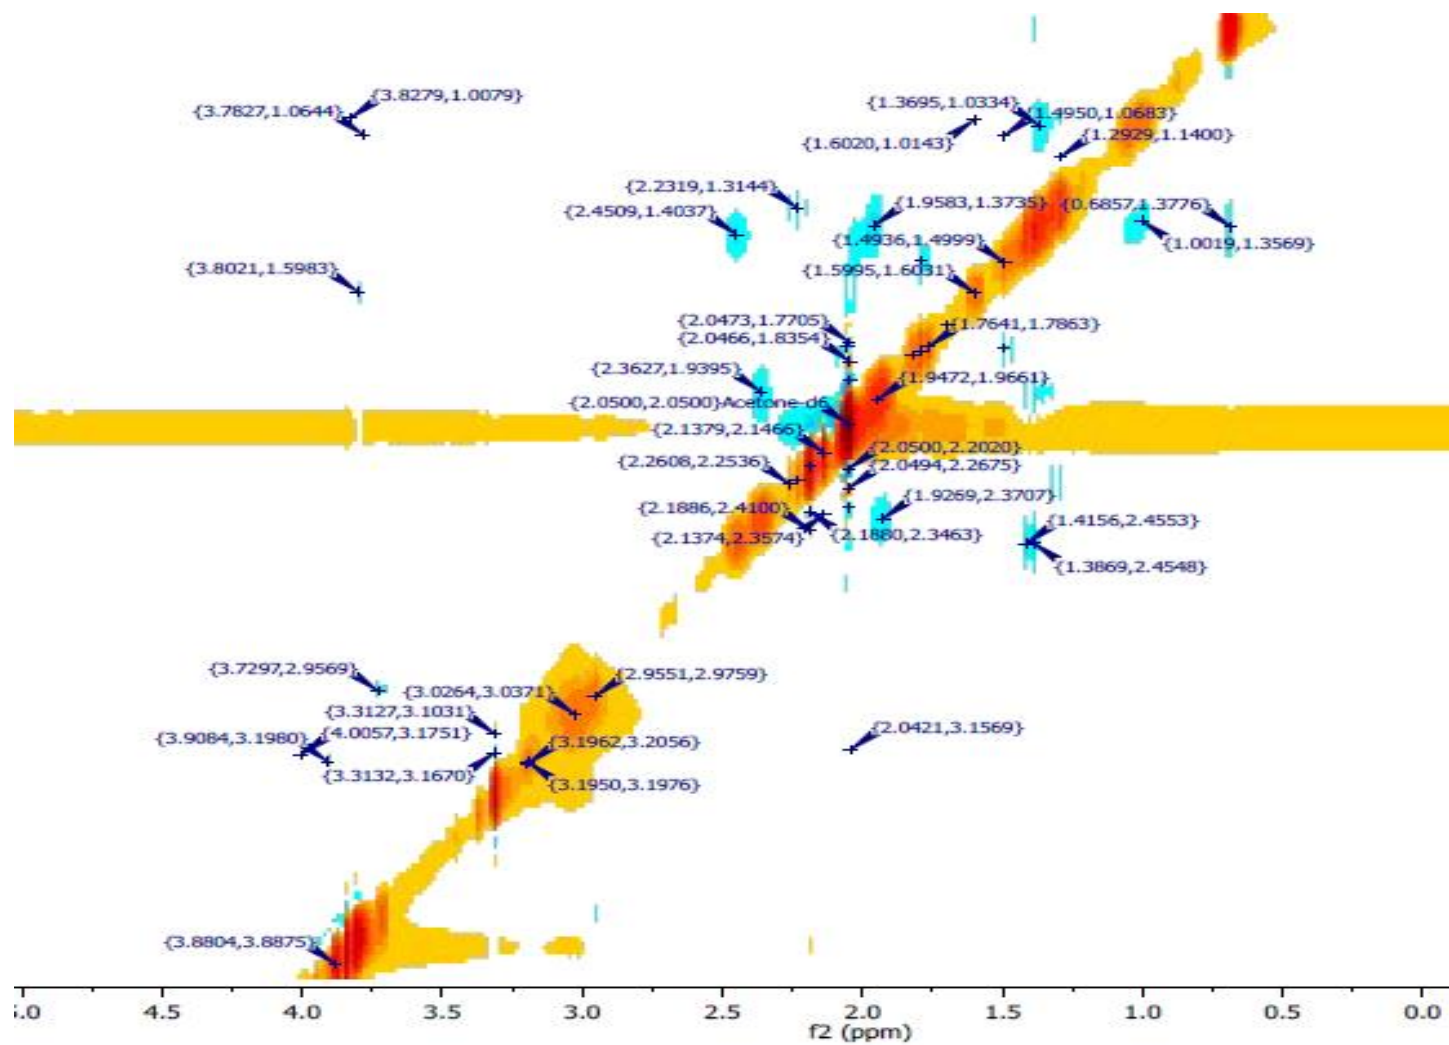

Figure S13. NOESY spectrum expansion of **1** and **2** (acetone- $d_6$ )
